# Supplementary material for: Arx expansion mutation perturbs cortical development by augmenting apoptosis without activating innate immunity in a mouse model of X-linked infantile spasms syndrome
Source: Oxford University Press journal article supplement (doi:10.1242/dmm.042515), 2020-02-07
Supplement: dmm042515supp.pdf [file dmm042515supp.pdf]

## Supplemental Information

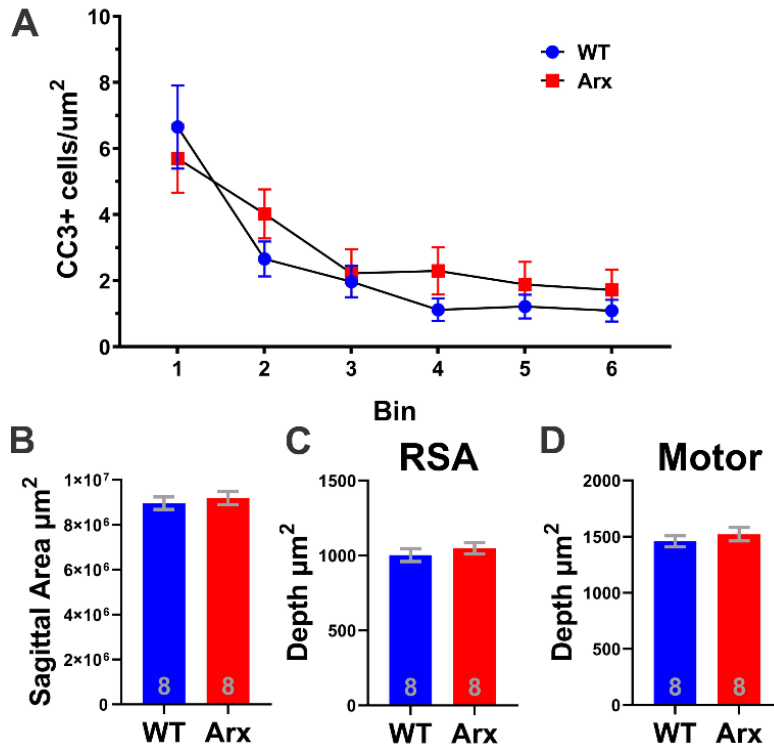

**Fig. S1. *Arx*<sup>(GCG)10+7</sup> mutants do not exhibit differences in CC3 distribution or neocortical size compared to WT littermates at P7.** (A) Distribution of CC3+ density in Arx mutants and WT littermates in 6 laminar bins (1 most superficial, 6 most deep bin). There was no difference between genotypes ( $F(1,96)=1.681$ ,  $P=0.1979$ ), a significant effect of bin ( $F(5,96)=13.81$ ,  $P<0.0001$ ), but no interaction between bin and genotype ( $F(5,96)=0.7028$ ,  $P=0.6226$ ) (Two Way ANOVA).  $N=10$  WT, 8 Arx. Mean and SEM are displayed. (B) Area ( $\mu\text{m}^2$ ) of WT and *Arx*<sup>(GCG)10+7</sup> mutant sagittal slices ( $P=0.5812$ , Unpaired t test). (C-D) Depth ( $\mu\text{m}$ ) of two different cortical regions showing no difference between genotypes: (C) RSA cortex ( $P=0.4316$ , Unpaired t test) and (D) Motor cortex ( $P=0.4321$ , Unpaired t test) cortex.  $N=8$  WT, 8 Arx. Mean and SEM are displayed.

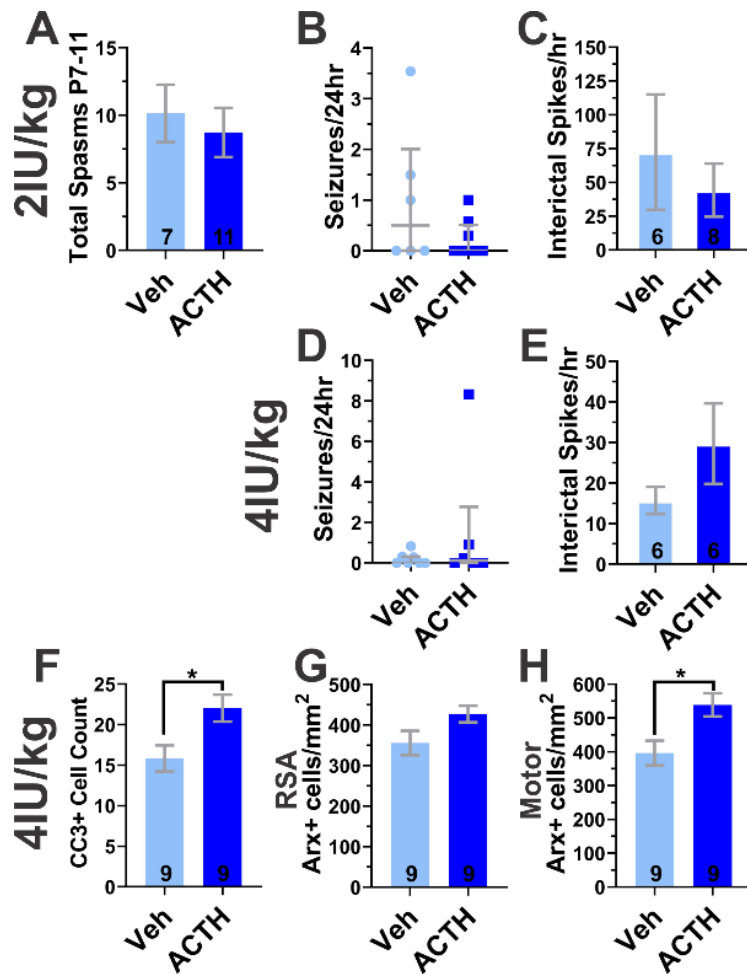

**Fig. S2. Neonatal ACTH(1-24) treatment modifies cellular pathology but has no effect on neonatal spasms and electrographic phenotypes in adult *Arx<sup>(GCG)10+7</sup>*.** Effect of daily P3-10 ACTH(1-24) treatment at (A-C) 2IU/kg/day and (D-H) 4IU/kg/day compared to saline vehicle (Veh) control injections. (A) Average cumulative P7-11 spasms ( $p=0.6253$ , Unpaired T Test). (B&D) Average daily seizure frequency (seizures/24hr) from weekly P45-72 (average of 89 hours of total recording per mouse) video EEG recordings following neonatal 2IU/kg/day or 4IU/kg/day ACTH(1-24) treatment. (B) 2IU/kg/day ACTH(1-24) treatment ( $p=0.3287$ , Mann Whitney Test) (N=6 Veh, 8 ACTH(1-24)). (D) 4IU/kg/day ACTH(1-24) treatment ( $p=0.8701$ , Mann Whitney Test) (N=6 Veh, 6 ACTH(1-24)). (C&E) Average interictal spike frequency (interictal spikes/hr) following neonatal 2IU/kg/day or 4IU/kg/day ACTH(1-24) treatment. (C)

2IU/kg/day ACTH(1-24) treatment ( $p=0.4908$ , Mann Whitney Test). (E) 4IU/kg/day ACTH(1-24) treatment ( $p=0.3939$ , Mann Whitney Test). **(F-H)** Effect of P3-7 4IU/kg/day ACTH(1-24) treatment compared to vehicle (Veh) treatment (saline) on CC3+ cell counts and Arx+ cell density in  $Arx^{(GCG)10+7}$  at P7. **(F)** Mean CC3+ counts in neocortex with ACTH(1-24) treatment ( $p=0.0166$ , Unpaired T Test) **(G-H)** Mean Arx+ cell density (Arx+ cells/mm<sup>2</sup>) with ACTH(1-24) treatment in (G) retrosplenial agranular (RSA) region ( $p=0.0673$ , Unpaired T Test) and (H) motor cortex ( $p=0.0117$ , Unpaired T Test). Mean and SEM are displayed. With the exception of B&D, all Ns are displayed on graph.

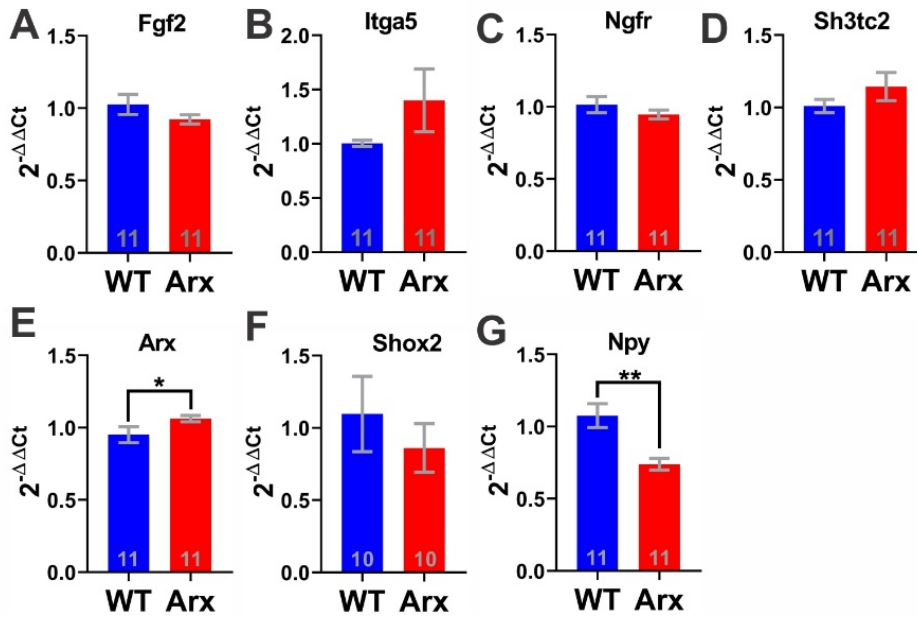

**Fig. S3. Validation of Nanostring candidates using qPCR did not reveal mRNA expression changes in *Fgf2*, *Itga5*, *Ngfr*, *Sh3tc2*, and *Shox2* but did reveal changes in *Arx* and *Npy* expression in *Arx*<sup>(GCG)10+7</sup> P7 cortex compared to WT littermates. (A-G) Average expression ( $2^{-\Delta\Delta Ct}$ ) of each mRNA candidate is displayed. (A) *Fgf2* ( $p=0.1330$ , Mann Whitney Test) (B) *Itga5* ( $p=0.4385$ , Mann Whitney Test) (C) *Ngfr* ( $p=0.3316$ , Mann Whitney Test) (D) *Sh3tc2* ( $p=0.3653$ , Mann Whitney Test) (E) *Arx* ( $p=0.0400$ , Mann Whitney Test) (F) *Shox2* ( $p=0.6842$ , Mann Whitney Test) (G) *Npy* ( $p=0.0019$ , Mann Whitney Test). Mean and SEMs are displayed. Ns are displayed on graph.**

|               |               |                |                |                  |
|---------------|---------------|----------------|----------------|------------------|
| <i>Ccl12</i>  | <i>Cx3cr1</i> | <i>Fasl</i>    | <i>Il4ra</i>   | <i>Prl</i>       |
| <i>Ccl5</i>   | <i>Cxcl10</i> | <i>Flt1</i>    | <i>Il6</i>     | <i>Tgfb1</i>     |
| <i>Ccr2</i>   | <i>Cxcl11</i> | <i>Flt4</i>    | <i>Il6ra</i>   | <i>Tgfb2</i>     |
| <i>Ccr5</i>   | <i>Cxcl12</i> | <i>Hgf</i>     | <i>Inhbb</i>   | <i>Tnf</i>       |
| <i>Cd40</i>   | <i>Cxcl16</i> | <i>Il10</i>    | <i>Lif</i>     | <i>Tnfrsf10b</i> |
| <i>Cntf</i>   | <i>Cxcr4</i>  | <i>Il10ra</i>  | <i>Ltbr</i>    | <i>Tnfrsf11b</i> |
| <i>Csf1</i>   | <i>Egf</i>    | <i>Il13ra1</i> | <i>Ngfr</i>    | <i>Tnfrsf12a</i> |
| <i>Csf1r</i>  | <i>Egfr</i>   | <i>Il15ra</i>  | <i>Osmr</i>    | <i>Tnfrsf1a</i>  |
| <i>Csf2rb</i> | <i>Epo</i>    | <i>Il1b</i>    | <i>Pdgfrb</i>  | <i>Tnfrsf1b</i>  |
| <i>Cx3cl1</i> | <i>Fas</i>    | <i>Il1r1</i>   | <i>Plekho2</i> | <i>Vegfa</i>     |

**Table S1.**

List of 50 cytokines and cytokine-related mRNA's from NCounter mouse Neuropathology panel used in Nanostring pathway analysis (See Fig. 5A).

| mRNA        | Correction Set    | Uncorrected P-value | Corrected P-Value | Log2 fold change | Linear fold change |
|-------------|-------------------|---------------------|-------------------|------------------|--------------------|
| Ngfr-mRNA   | Overlapping       | 0.00138             | 1                 | -1.110           | 0.465              |
| Sh3tc2-mRNA | Overlapping       | 0.00707             | 1                 | -0.628           | 0.647              |
| Fgf2-mRNA   | Litter Correction | 0.00454             | 1                 | -0.325           | 0.798              |
| Itga5-mRNA  | Overlapping       | 0.00205             | 1                 | -0.319           | 0.801              |
| Hdac7-mRNA  | Overlapping       | 0.00135             | 1                 | -0.173           | 0.887              |
| Npy-mRNA    | Batch Correction  | 0.00462             | 1                 | -0.171           | 0.888              |
| Sirt1-mRNA  | Batch Correction  | 0.00681             | 1                 | -0.162           | 0.894              |
| Vegfa-mRNA  | Overlapping       | 0.00583             | 1                 | -0.141           | 0.907              |
| Atf4-mRNA   | Overlapping       | 0.00878             | 1                 | -0.118           | 0.921              |
| Htr1a-mRNA  | Batch Correction  | 0.00797             | 1                 | -0.115           | 0.923              |
| Acaa1a-mRNA | Batch Correction  | 0.00493             | 1                 | -0.093           | 0.937              |
| Pnkd-mRNA   | Batch Correction  | 0.00945             | 1                 | -0.094           | 0.937              |
| Ran-mRNA    | Overlapping       | 0.00594             | 1                 | -0.092           | 0.938              |
| Ap4s1-mRNA  | Overlapping       | 0.00354             | 1                 | -0.081           | 0.945              |
| Ikbkb-mRNA  | Batch Correction  | 0.00959             | 1                 | 0.080            | 1.06               |

**Table S2. Differentially expressed mRNA candidates between WT and  $Arx^{(GCG)10+7}$  using Nanostring.** Data was corrected for batch and litter effects and 15 differentially expressed candidates were chosen based on uncorrected P-value less than 0.01. Highlighted candidates were chosen for validation by qRT-PCR.

| Gene Name     | Accession ID   | Probe Target Sequence                                                                                         |
|---------------|----------------|---------------------------------------------------------------------------------------------------------------|
| <b>Arx</b>    | NM_007492.3    | TACTGAAAATAACCCGGGAGGGGTTCTCCCAATA<br>TGCTTAGTATTGAAGTTTAAAAATTAAGCCCAAC<br>CTTCTCTTCTCCGGATACCCCACTTAGC      |
| <b>Birc6</b>  | NM_007566.3    | TCGGCGCTCAGCGCTAAACCAGGTGGACAGGTGA<br>AATGTCAGTATATTTCTGCTGTGGATAAAGTGATAT<br>TTGTGGATGATTACGCCGTGGGCTGTAGGA  |
| <b>Csrnp3</b> | NM_178634.2    | AAAGGACTTTGGGTTTGTTCATGCTATTGAAAGCAGT<br>AATGGGGGCTGACTACTCCTTTTGGTTGACCGGTG<br>GGGCTAATCTGGTGGGAATTCTGTGGTAA |
| <b>Cxcr5</b>  | NM_007551.2    | ACCGTGCCTTTCTCTTAACCAAGCAGAAAGCTGAAA<br>CCGATCTACTTTAGGTAGCTGTCTGGTTCCAACCTA<br>ACCAGCATTGGGTGAGCCCATGTTACT   |
| <b>Drap1</b>  | NM_024176.1    | TGCCAAAACCATGACCACGTCCCACCTGAAGCAGT<br>GCATTGAACTCGAGCAGCAGTTTGACTTCTTGA<br>GACTTGGTGGCATCAGTGCCTGACATGCAG    |
| <b>Ebf1</b>   | NM_007897.2    | CATAGGGGACAATTTCTTTGATGGGTTACAGGTCAT<br>ATTCGGTACCATGCTGGTCTGGAGTGAGTTGATAA<br>CTCCTCATGCCATCCGAGTTCAGACACCT  |
| <b>Endog</b>  | NM_007931.1    | GGAACAACCTTGAGAGGTACAGCCGCAGCTTGACG<br>CGAATTACAAAATGTCTATGTCTGCACGGGGCC<br>GCTTTTCTGCCAGGACCGAGGCTGATGG      |
| <b>Erbp4</b>  | NM_010154.1    | TCCTGGTGATCATGGCTTTGACATTTGCTGTCTATG<br>TCAGAAGAAAGAGCATCAAAAAGAAACGTGCTTTG<br>AGGAGATTCTGGAGACAGAGCTGGTAGA   |
| <b>Esr1</b>   | NM_007956.4    | ACTCGCTACTGTGCCGTGTGCAATGACTATGCCTC<br>TGGCTACCATTATGGGGTCTGGTCTGCGAAGGCT<br>GCAAGGCTTTCTTAAAGAGAAGCATTCAAG   |
| <b>Esr2</b>   | NM_010157.3    | TGCTTCTTATAACTGTAGCCAGTCCATCCTACCCTT<br>GGAGCATGGTCCCATCTATATCCCTTCTCCTATGT<br>AGAGAGCCGTCACGAATACTCAGCCATG   |
| <b>Ghrh</b>   | NM_010285.2    | GGATGCAGCGACACGTAGATGCCATCTTACCACC<br>AACTACAGGAACTCCTGAGCCAGCTGTATGCCCG<br>GAAAGTGATCCAGGACATCATGAACAAGCA    |
| <b>Gnmt</b>   | NM_010321.1    | GGGTCATTGAAGAAGCCAACCTGGTTGACGCTGGAC<br>AAAGATGTGCTTTCAGGAGATGGCTTTGATGCTGT<br>CATCTGCCTTGGGAACAGTTTTGCTCACTT |
| <b>Hdac4</b>  | NM_207225.1    | AGACGCTGAGTACTTGGCAGCCTCAGAACGGTGG<br>TTATGCCTATCGCAAATGAGTTTGCCCCAGATGTG<br>GTACTGGTGTTCATCGGGCTTCGATGCTGTG  |
| <b>Hipk2</b>  | NM_010433.2    | AGGAAGCAAGAAAGTACATTTTCAACTGTTTGGATG<br>ATATGGCCCAGGTGAACATGACAACAGATTTGGAA<br>GGGAGTGACATGTTAGTAGAGAAGGCAGA  |
| <b>Kcnma1</b> | NM_001253361.1 | CGCATGTGGTGGGCTTTCTTGGCCTCCTCCATGGT<br>GACTTTCTTCGGGGGCTTTCATCATCTTGCTCTG<br>GCGGACGCTCAAGTACCTGTGGACCGTTT    |
| <b>Kif26b</b> | NM_001161665.1 | CATGATCGGAAGGGACGACTCTATGCAGAACCTGG<br>GCATTATTCCATGTGCTATTTCTTGGCTGTTCAAGC<br>TTATCAATGAGCGCAAAGAGAAGACGGGG  |

|                     |                    |                                                                                                               |
|---------------------|--------------------|---------------------------------------------------------------------------------------------------------------|
| <b>Mef2c</b>        | NM_001170<br>537.1 | TTCTACTACTAAAGGTATCAATGGAACATGAAGACG<br>AGTATTTAGGCAGAAGCAAACAGGAAACCATCCTT<br>ACAAACATGCTTACCTGCACATCTGTTT   |
| <b>Msx2</b>         | NM_013601.<br>2    | CTACCCCTTCCATAGACCTGTGCTCCCCATCCCGC<br>CTGTTGGACTCTATGCCACGCCGGTTGGATATGGC<br>ATGTACCATCTATCCTAAGGAAGACCAGAT  |
| <b>Myt1l</b>        | NM_001093<br>775.1 | ATCAGTGACAGAAGTTATGCTGAGGGGATGTCACA<br>GCAGGACAGTAGAAATATGAACTATGTCATGCTAG<br>GGAAGCCCATGAACAATGGACTCATGGAGA  |
| <b>Ndufa1<br/>3</b> | NM_023312.<br>2    | CAGATTCTCCGGGAAAACCTGGAGGAGGAAGCCAT<br>CATCATGAAGGATGTGCCCAACTGGAAGGTGGGC<br>GAGTCTGTGTTCCATACCACACGATGGGTGC  |
| <b>Pcdhg<br/>a5</b> | NM_033588.<br>4    | CAGACTTTTCGAGCACCGTCCATATCAGCGTGACC<br>GTTCTTGATGCAAACGATAACGCACCCTTGTTTACC<br>CAAAGCGAATATAGGGTGAGTGTTCCGGA  |
| <b>Pde3a</b>        | NM_018779.<br>1    | ATATAGGAAGAAAATGTGGCCGTATTCTGAGCCAG<br>GTATCATACAGACTGTTTGAAGACATGGGGCTCTTT<br>GAAGCCTTTAAATCCCGGTTAGGGAGTT   |
| <b>Perp</b>         | NM_022032.<br>4    | CTTCACGATAACCCTGCTGTTAATTACATCTATAAC<br>TGGGCCTATGGCTTCGGATGGGCGGCCACCATCAT<br>CTTGATTGGTTGTTCCCTTCTTCTTCTGCT |
| <b>Prdx5</b>        | NM_012021.<br>2    | AAAGAAGGTGAACTTGGCAGAGCTGTTCAAGGGCA<br>AGAAAGGTGTTTTGTTTGGAGTCCCTGGGGCATT<br>ACACCTGGCTGTTCTAAGACCCACCTGCCT   |
| <b>Samd5</b>        | NM_177271.<br>3    | GATGAGATGCGGAAGACTGGAAAGGGGCGTATTTA<br>GGACCTTCTTTCACAAAGGGAAGTGGATGGTGACT<br>CTGCAAACACTTATCAGCTTAACGTTTTCT  |
| <b>Sfn</b>          | NM_018754.<br>2    | AATCTGATTTGGTAATCCAAGACGCTCCTGCAATGC<br>AGCCAGCCCTGAACTGCAGGGGGCAGTCTGGAGC<br>CGAAAGGTGCCTTTGCAGGTGGGACCTGCG  |
| <b>Shox2</b>        | NM_013665.<br>1    | ATTTTACCCTGGAACAACCTCAACGAGCTGGAGAGG<br>CTTTTCGATGAGACCCACTATCCAGACGCTTTCATG<br>CGCGAGGAATTGAGCCAGCGACTGGGGCT |
| <b>Twist1</b>       | NM_011658.<br>2    | AATGGACAGTCTAGAGACTCTGGAGCTGGATAACT<br>AAAAATAAATCTATATGACAAAGATTTTCATGGAAAT<br>TAGAAGAGCAGAGACCAAATTCACAAGA  |
| <b>Zfp369</b>       | NM_178364.<br>5    | GTTACAAGGTTTCATCTGCACAAAATCACCAGATGG<br>GGTCTAGGGCAGGAAGAGCCAGGGACAACAGCAT<br>CTTAACACATGTAAAAATTCACCAGAAAGGC |

**Table S3**

List of 29 additional mRNA probes added to the Nanostring Mouse Neuropathology panel.



| Probe         | TaqMan™ Assay ID | Use                     |
|---------------|------------------|-------------------------|
| <i>Lars</i>   | Mm00506560_m1    | Normalizer/Housekeeping |
| <i>Tnf</i>    | Mm00443258_m1    | Target                  |
| <i>Il6</i>    | Mm00446190_m1    | Target                  |
| <i>Il1b</i>   | Mm00434228_m1    | Target                  |
| <i>Fgf2</i>   | Mm00433287_m1    | Target                  |
| <i>Itga5</i>  | Mm00439797_m1    | Target                  |
| <i>Ngfr</i>   | Mm00446294_m1    | Target                  |
| <i>Sh3tc2</i> | Mm01261770_m1    | Target                  |
| <i>Arx</i>    | Mm00545903_m1    | Target                  |
| <i>Shox2</i>  | Mm00443183_m1    | Target                  |
| <i>Npy</i>    | Mm00445771_m1    | Target                  |

**Table S4**

TaqMan™ Gene Expression Assay ID's used for qPCR validation. *Lars* mRNA expression was used as a normalization/housekeeping gene as it was computationally identified by Nanostring assay as having adequate expression and low variability between samples.
